# Supplementary material for: Species Distribution and Antifungal Susceptibilities of Aspergillus Section Terrei Isolates in Clinical Samples from the United States and Description of Aspergillus pseudoalabamensis sp. nov
Source: MDPI journal article supplement (doi:10.3390/pathogens12040579), 2023-04-11
Supplement: s1 [file s1]

**Supplemental Table S1.** Site of culture of 278 *Aspergillus* section *Terrei* clinical isolates

between October 2015 and January 2020 from across the U.S.

| Culture Site            | Percent |
|-------------------------|---------|
| Lower respiratory tract | 46.8%   |
| Upper respiratory tract | 22.7%   |
| Lower extremity         | 7.2%    |
| Upper extremity         | 2.9%    |
| Back/abdomen            | 2.9%    |
| Head                    | 2.2%    |
| Blood                   | 1.8%    |
| Eye                     | 1.8%    |
| Lung tissue             | 1.8%    |
| Heart                   | 1.4%    |
| Bone                    | 1.1%    |
| Unknown                 | 7.2%    |

**Supplemental Table S2.** Percent matches of *A. pseudoalabamensis* type strain to other types

strains within *Aspergillus* section *Terrei* based on BLASTn searches. These matches are to Type strains, as indicated by the T superscript.

| <i>A. pseudoalabamensis</i> UTHSCSA DI16-489 <sup>T</sup> |                                                |               |
|-----------------------------------------------------------|------------------------------------------------|---------------|
| Region                                                    | Top Match                                      | Percent Match |
| ITS                                                       | <i>A. heldtiae</i> PPRI 4229 <sup>T</sup>      | 99.51         |
|                                                           | <i>A. alabamensis</i> CBS 125693 <sup>T</sup>  | 99.18         |
|                                                           | <i>A. terreus</i> ATCC 1012 <sup>T</sup>       | 99.01         |
|                                                           | <i>A. hortae</i> CBS 124230 <sup>T</sup>       | 99.01         |
| <i>BenA</i>                                               | <i>A. alabamensis</i> CBS 125693 <sup>T</sup>  | 95.36         |
|                                                           | <i>A. jilinensis</i> CBS NN058401 <sup>T</sup> | 94.79         |
|                                                           | <i>A. heldtiae</i> PPRI 4229 <sup>T</sup>      | 92.89         |
|                                                           | <i>A. hortae</i> CBS 124230 <sup>T</sup>       | 92.66         |
| <i>CaM</i>                                                | <i>A. heldtiae</i> PPRI 4229 <sup>T</sup>      | 96.17         |
|                                                           | <i>A. jilinensis</i> CBS NN058401 <sup>T</sup> | 96.12         |
|                                                           | <i>A. alabamensis</i> CBS 125693 <sup>T</sup>  | 96.11         |
|                                                           | <i>A. citrinoterreus</i> GM228 <sup>T</sup>    | 96.05         |
| <i>RPB2</i>                                               | <i>A. alabamensis</i> CBS 125693 <sup>T</sup>  | 98.53         |
|                                                           | <i>A. heldtiae</i> PPRI 4229 <sup>T</sup>      | 97.80         |
|                                                           | <i>A. citrinoterreus</i> GM228 <sup>T</sup>    | 97.80         |
|                                                           | <i>A. hortae</i> CBS 124230 <sup>T</sup>       | 97.43         |

**Supplemental Figure S1** Maximum likelihood trees showing phylogenies of the individual loci.

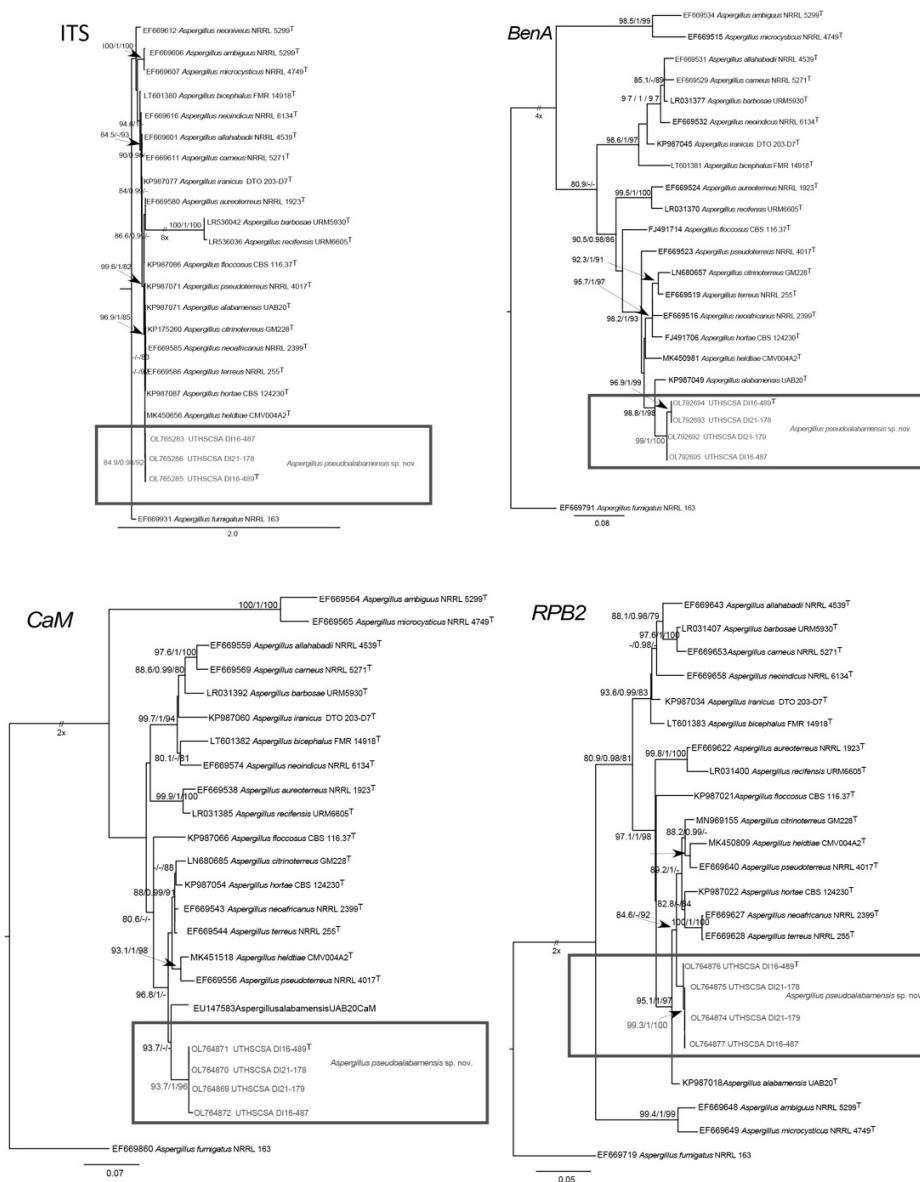

**Figure S1.** showing the placement of the new species of *Aspergillus* in the section *Terrei* and its relationship with other species in the section. Support values for SH-aLRT ( $\geq 80\%$ ), aBayes ( $\geq 0.95$ ), BS ( $\geq 75\%$ ) respectively are indicated on the nodes. <sup>T</sup> = represent type strains. GenBank accession numbers for all sequences are shown before the names and strain accession numbers are shown after the name. Dashes represent values lower than SH-aLRT (80%), aBayes (0.95), and BS (75%).
